# Supplementary material for: Global Childhood Deaths From Pertussis: A Historical Review
Source: PubMed Central journal article supplement (PMC5106618; doi:10.1093/cid/ciw529), 2016-11-02

## Supplemental Figure 1

### PRISMA flow chart showing the identification of the studies

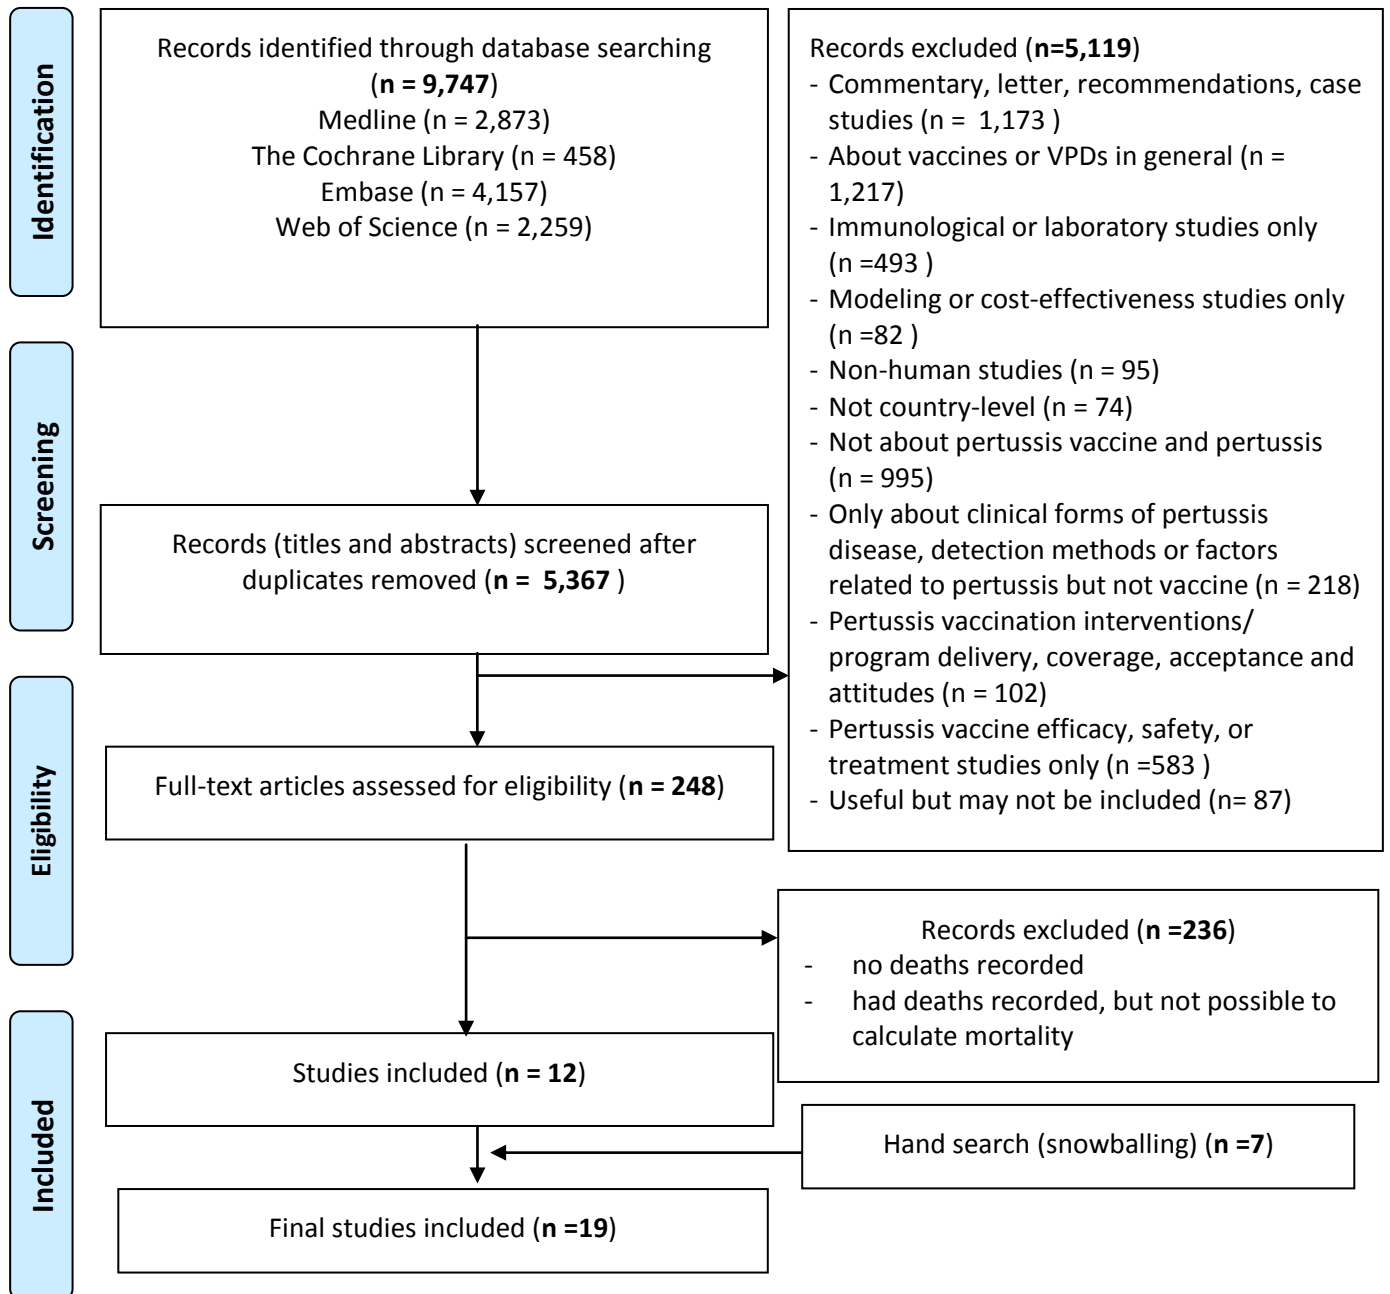

Supplement: supp_ciw529_ciw529supp.pdf [file supp_ciw529_ciw529supp.pdf]
